# Supplementary material
Source: Springer Nature journal article supplement (https://www.springermedizin.de/resource/supplementary/13058_2004_961_MOESM1_ESM.pdf/9705738)

Counts

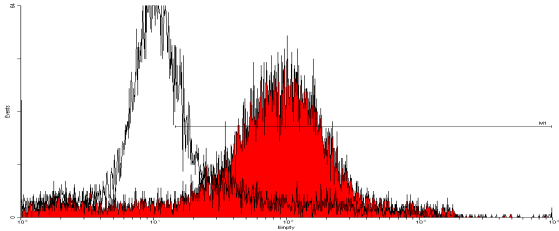

Fluorescence

Supplement: MOESM1 [file 9705738]
